# Supplementary material
Source: PubMed Central journal article supplement (PMC3676669)
Supplement: NIHMS466987-supplement-supplemental.pdf [file NIHMS466987-supplement-supplemental.pdf]

# Cellular and Computational Studies of Proteasome Inhibition and Apoptosis Induction in Human Cancer Cells by Amino Acid Schiff Base-Copper Complexes

Jian Zuo <sup>a,b</sup>, Caifeng Bi <sup>a</sup>, Yuhua Fan <sup>a,\*</sup>, Daniela Buac <sup>b</sup>, Chiara Nardon <sup>b,c</sup>, Kenyon G. Daniel <sup>d,e</sup>,  
Q. Ping Dou <sup>b,\*</sup>

<sup>a</sup> College of Chemistry and Chemical Engineering, Ocean University of China, Qingdao, Shandong 266100, People's Republic of China

<sup>b</sup> Molecular Therapeutics Program, Barbara Ann Karmanos Cancer Institute, Departments of Oncology, Pharmacology and Pathology, School of Medicine, Wayne State University, Detroit, Michigan 48201, United States

<sup>c</sup> Department of Chemical Sciences, University of Padova, Via Marzolo 1, 35131 Padova, Italy

<sup>d</sup> Virtual Screening and Molecular Modeling Core, Moffitt Cancer Center and Research Institute, Tampa, Florida 33612, United States

<sup>e</sup> Department of Cell Biology, Microbiology, and Molecular Biology, University of South Florida, Tampa, Florida 33620, United States

\* Corresponding authors. Fax: 0532-66781932. E-mail: [fanyuhua301@163.com](mailto:fanyuhua301@163.com) (Yuhua Fan)

Fax: 313-576-8307. E-mail: [doup@karmanos.org](mailto:doup@karmanos.org) (Q. Ping Dou)

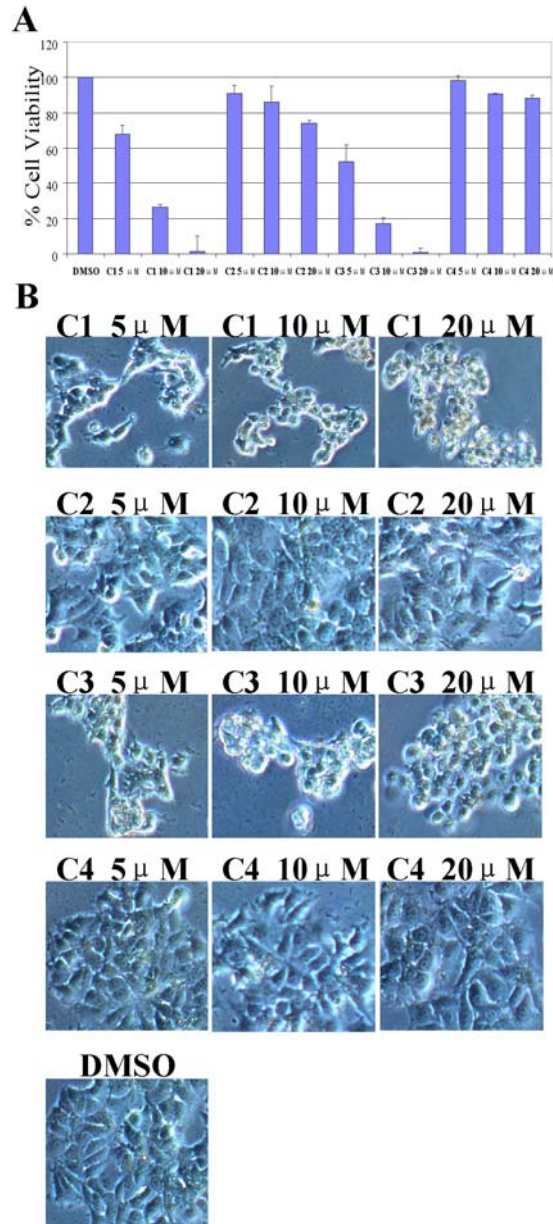

**Figure S1. Dose response experiment using C1, C2, C3 and C4 in human breast cancer MCF-7 cells.** MCF-7 cells were treated with either solvent DMSO or indicated concentrations of C1-C4 for 24 h. (A) MTT assay. (B) Morphological changes.

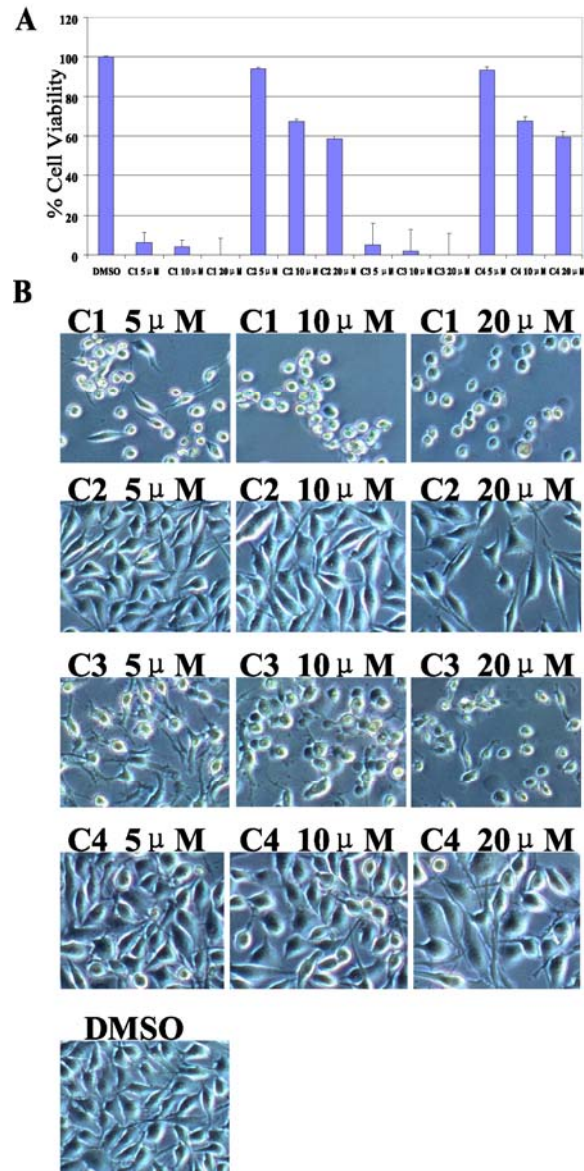

**Figure S2. Dose response experiment using C1, C2, C3 and C4 in human prostate cancer PC-3 cells.** PC-3 cells were treated with either solvent DMSO or indicated concentrations of C1-C4 for 24 h. (A) MTT assay. (B) Morphological changes.

**Table S1. Crystal data and structure refinement for complexes 1 and 2**

|                                                     | <b>C 1</b>                                                         | <b>C 2</b>                                                        |
|-----------------------------------------------------|--------------------------------------------------------------------|-------------------------------------------------------------------|
| Empirical formula                                   | C <sub>25</sub> H <sub>41</sub> CuN <sub>3</sub> O <sub>13</sub> S | C <sub>23</sub> H <sub>29</sub> CuN <sub>3</sub> O <sub>7</sub> S |
| Formula weight                                      | 687.21                                                             | 555.09                                                            |
| Crystal system                                      | Monoclinic                                                         | Monoclinic                                                        |
| Space group                                         | <i>C2/c</i>                                                        | <i>P2<sub>1</sub>/c</i>                                           |
| <i>a</i> (Å)                                        | 22.510(2)                                                          | 11.0970(11)                                                       |
| <i>b</i> (Å)                                        | 21.479(2)                                                          | 19.101(2)                                                         |
| <i>c</i> (Å)                                        | 14.8300(17)                                                        | 13.2031(12)                                                       |
| $\alpha$ (°)                                        | 90                                                                 | 90                                                                |
| $\beta$ (°)                                         | 92.7460(10)                                                        | 114.1490(10)                                                      |
| $\gamma$ (°)                                        | 90                                                                 | 90                                                                |
| <i>V</i> (Å <sup>3</sup> )                          | 7162.0(13)                                                         | 2553.7(4)                                                         |
| <i>Z</i>                                            | 8                                                                  | 4                                                                 |
| $\rho_{\text{calc}}$ (Mg/m <sup>3</sup> )           | 1.275                                                              | 1.444                                                             |
| $\mu$ (mm <sup>-1</sup> )                           | 0.727                                                              | 0.984                                                             |
| <i>F</i> (000)                                      | 2888                                                               | 1156                                                              |
| Theta range (°)                                     | 2.34-25.02                                                         | 2.00-25.02                                                        |
| Temperature (K)                                     | 298(2)                                                             | 298(2)                                                            |
| Wavelength (Å)                                      | 0.71073                                                            | 0.71073                                                           |
| Crystal size (mm <sup>3</sup> )                     | 0.45 x 0.26 x 0.25                                                 | 0.49 x 0.45 x 0.40                                                |
| No. of data collected                               | 14700                                                              | 12559                                                             |
| No. of data used                                    | 6031                                                               | 4505                                                              |
| <i>R</i> <sub>1</sub> [ <i>I</i> > 2σ( <i>I</i> )]  | 0.0784                                                             | 0.0333                                                            |
| <i>wR</i> <sub>2</sub> [ <i>I</i> > 2σ( <i>I</i> )] | 0.1798                                                             | 0.0772                                                            |
| <i>R</i> <sub>1</sub> [all data]                    | 0.1710                                                             | 0.0545                                                            |
| <i>wR</i> <sub>2</sub> [all data]                   | 0.1967                                                             | 0.0902                                                            |
| GOF                                                 | 1.003                                                              | 1.041                                                             |
